# Supplementary material for: The role of ROS and subsequent DNA-damage response in PUMA-induced apoptosis of ovarian cancer cells
Source: PubMed Central journal article supplement (PMC5410321; doi:10.18632/oncotarget.15626), 2017-02-22
Supplement: oncotarget-08-23492-s001.pdf [file oncotarget-08-23492-s001.pdf]

## The role of ROS and subsequent DNA-damage response in PUMA-induced apoptosis of ovarian cancer cells

### Supplementary Materials

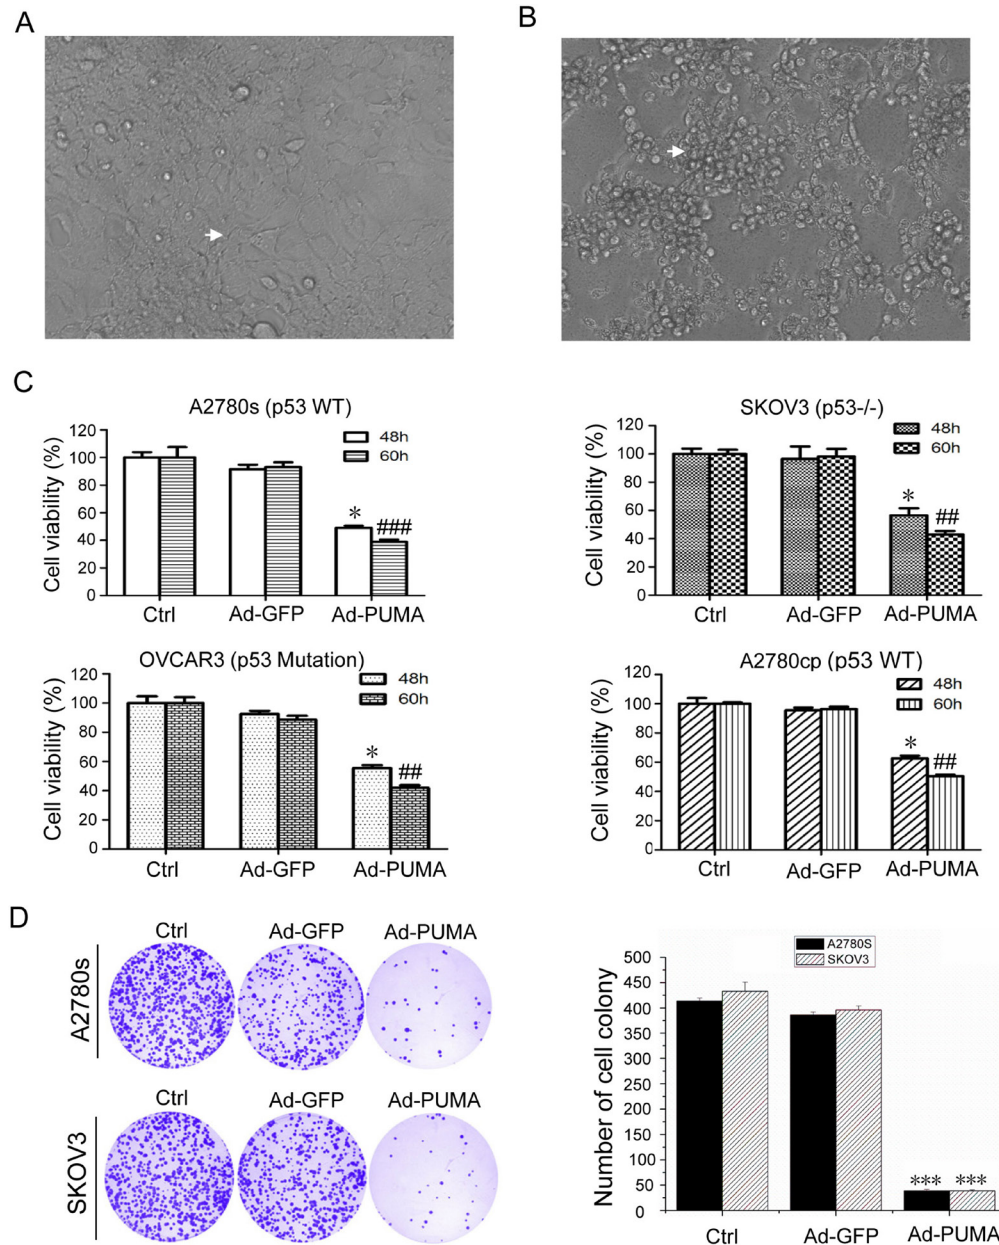

**Supplementary Figure 1: PUMA reduces viability of ovarian cancer cells.** (A) The morphological change of HEK293A cells before infection with PUMA adenovirus for 36h. Arrows, typical cell morphology. (B) The morphological change of HEK293A cells after infection with PUMA adenovirus for 36 h. Arrows, typical cell morphology. (C) MTT was done to analyze the viability of ovarian cancer cells. PUMA overexpression significantly reduced the viability of A2780s, SKOV3, OVCAR3 and A2780cp cells, compared with the control group (\* $P < 0.05$ ; ## $P < 0.01$  and ### $P < 0.001$ ). The percentage of survival was calculated. Results are shown as means  $\pm$  S.D. of three wells and triplicate experiments. In each experiment, the medium-only treatment (untreated) indicates 100% cell viability. (D) Colony formation assays were further used to evaluate the viability of A2780s and SKOV3 cells. PUMA overexpression resulted in significant inhibition of clone formation compared with the control and Ad-GFP groups. Bars, mean; error bars, S.D. ( $n = 3$ , \*\*\* $p < 0.001$ ).

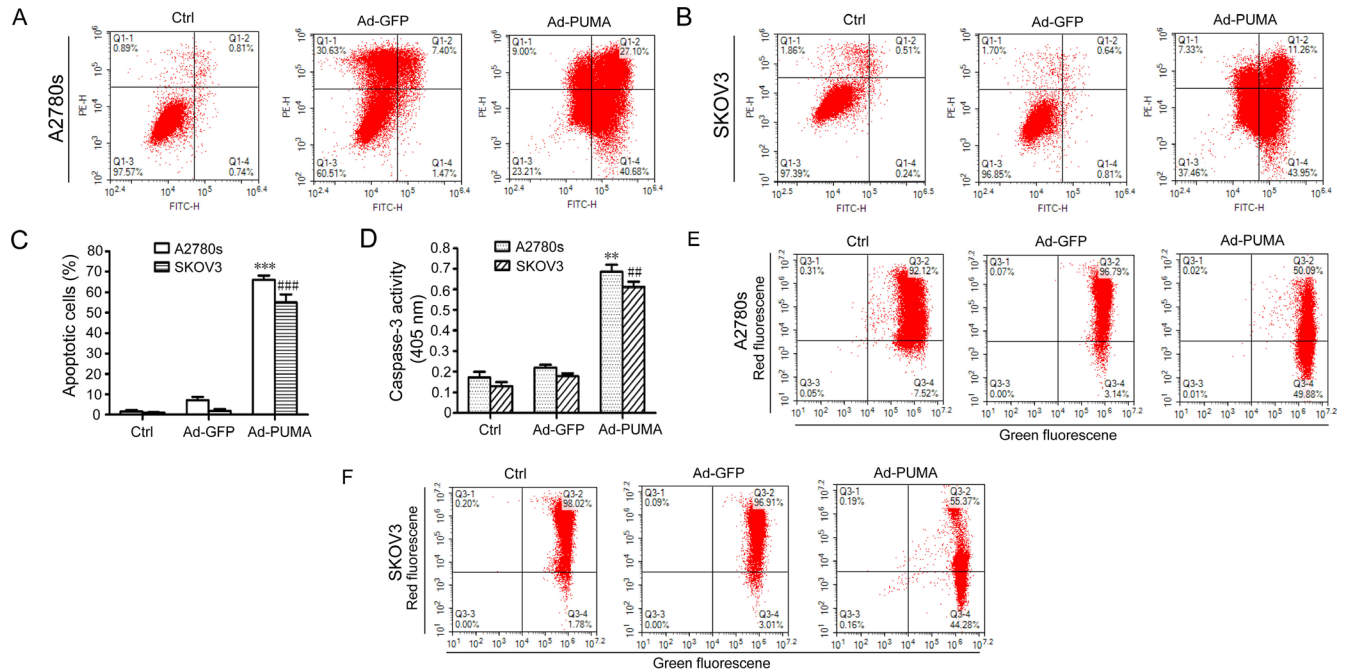

**Supplementary Figure 2: PUMA induces apoptosis via mitochondrial apoptotic pathway.** (A) A2780s cells were untreated or infected with Ad-GFP or Ad-PUMA for 60 h. The treated cells were used for analysis of apoptosis by flow cytometry. (B) SKOV3 cells were treated as described in A, then the treated cells were used for analysis of apoptosis by flow cytometry. (C) Apoptotic A2780s and SKOV3 cells were further counted. Bars, mean; error bars, S.D. ( $n = 3$ ; \*\*\* $p < 0.001$ ; ### $p < 0.001$ ). (D) PUMA activated caspase-3 both in A2780s and SKOV3 cells. A2780s and SKOV3 cells were infected with Ad-GFP or Ad-PUMA for 60 h. The treated cells were then lysed and caspase 3 activity was measured using an assay kit ( $n = 3$ ; \*\* $p < 0.01$ ; ## $p < 0.01$ ). (E) PUMA decreased the mitochondria membrane potential ( $\Delta\psi$ ) of A2780s cells. The cells were treated as described in C. The treated cells were used to measure the membrane potential by JC-1 dye retention using flow cytometry. (F) PUMA decreased the mitochondria membrane potential ( $\Delta\psi$ ) of SKOV3 cells. The cells were treated as described in C. The treated cells were used to measure the membrane potential by JC-1 dye retention using flow cytometry.

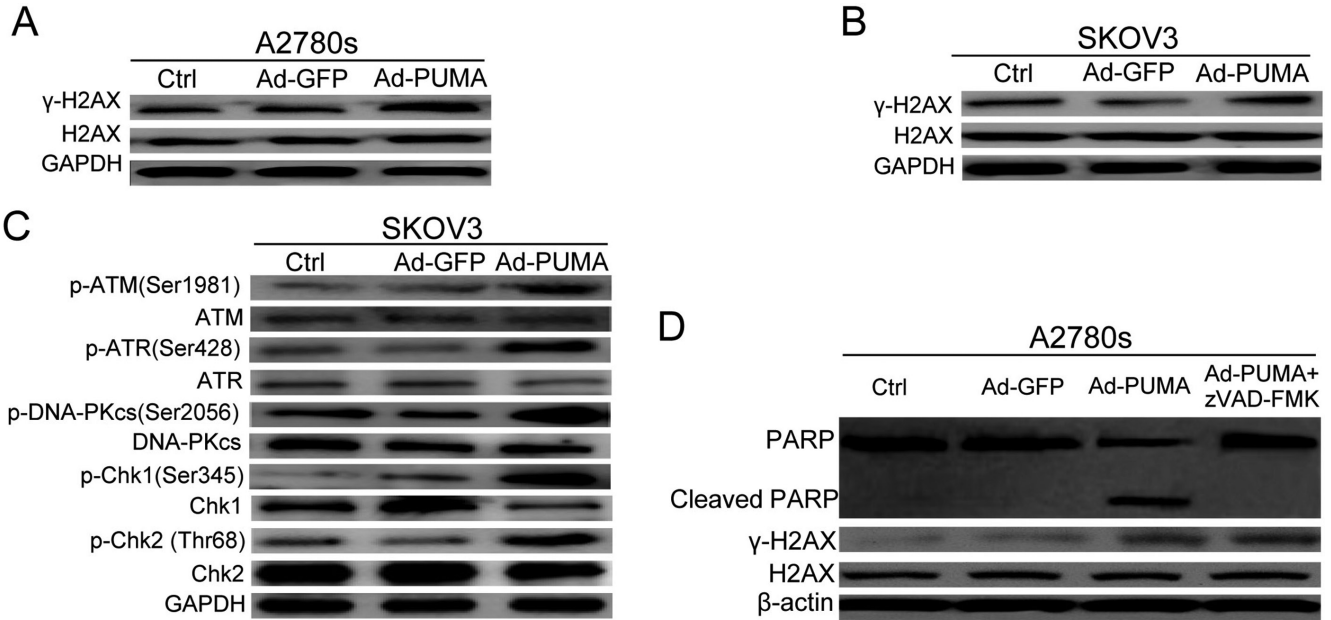

**Supplementary Figure 3: Detection of ROS-triggered caspase-independent DNA damage.** (A). A2780s cells were infected with PUMA adenovirus for 36 h, and then phosphorylated H2AX ( $\gamma$ -H2AX) and total H2AX in both cells were analyzed by western blotting. GAPDH was used as a loading control. (B) SKOV3 cells were infected with PUMA adenovirus for 36 h, and then phosphorylated H2AX ( $\gamma$ -H2AX) and total H2AX in both cells were analyzed by western blotting. GAPDH was used as a loading control. (C). SKOV3 cells were treated as described in B, and then the levels of total and phosphorylated ATM, ATR and DNA-PKcs, Chk1 and Chk2 in both cells were analyzed by western blotting. GAPDH was used as a loading control. (D) A2780s cells were infected with Ad-PUMA for 48 h in the presence or absence of 10  $\mu$ M benzyloxycarbonyl-VAD-fluoromethyl ketone (z-VAD-FMK), and then cleavage of PARP,  $\gamma$ -H2AX and total H2AX were detected by western blotting.  $\beta$ -actin was used as a loading control.
